# Supplementary material for: Machine learning based classification of mitochondrial morphologies from fluorescence microscopy images of Toxoplasma gondii cysts
Source: PubMed Central journal article supplement (PMC9894464; doi:10.1371/journal.pone.0280746), 2023-02-02

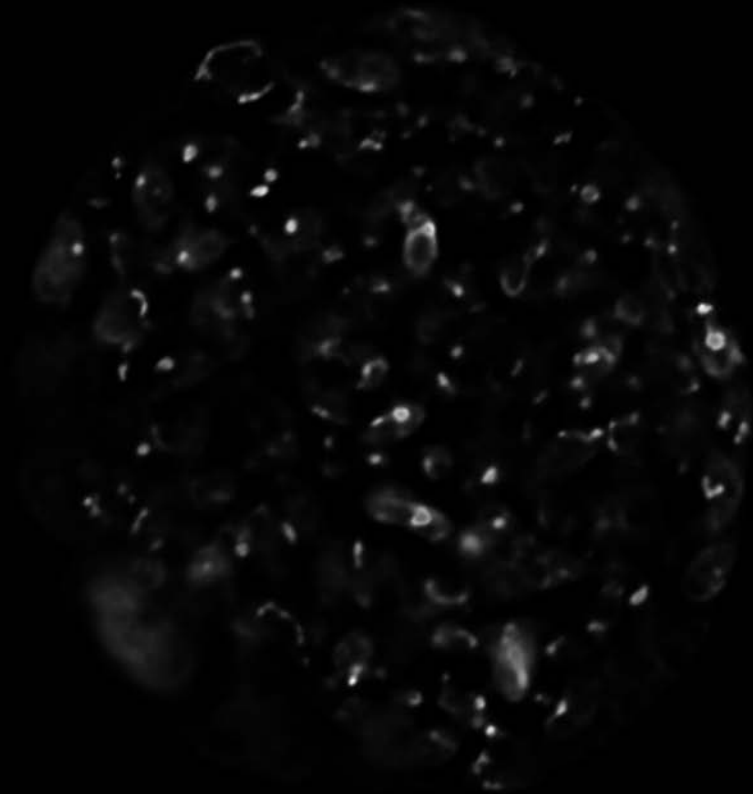

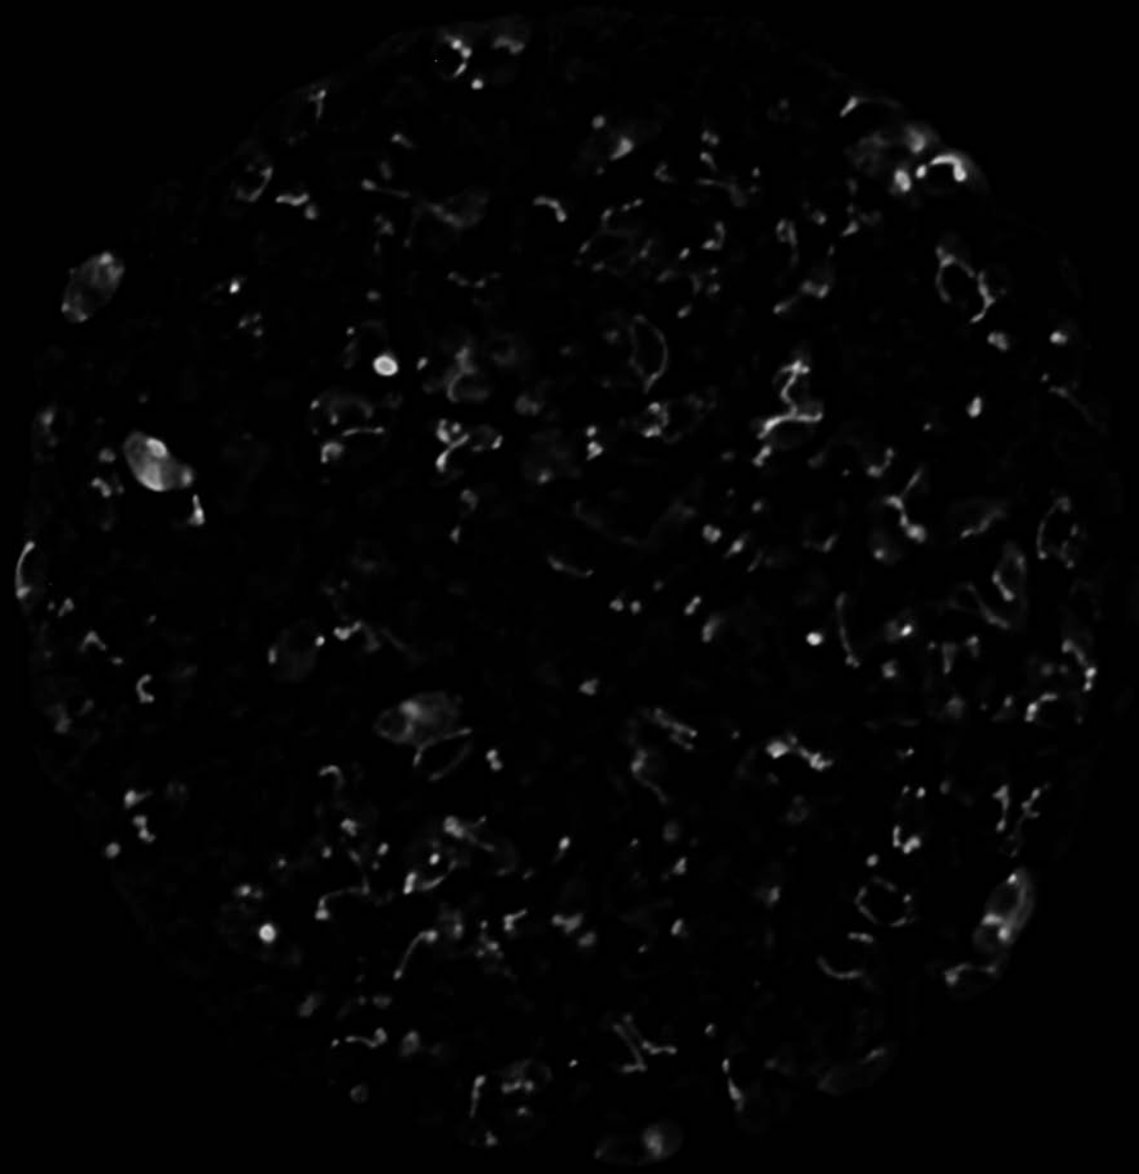

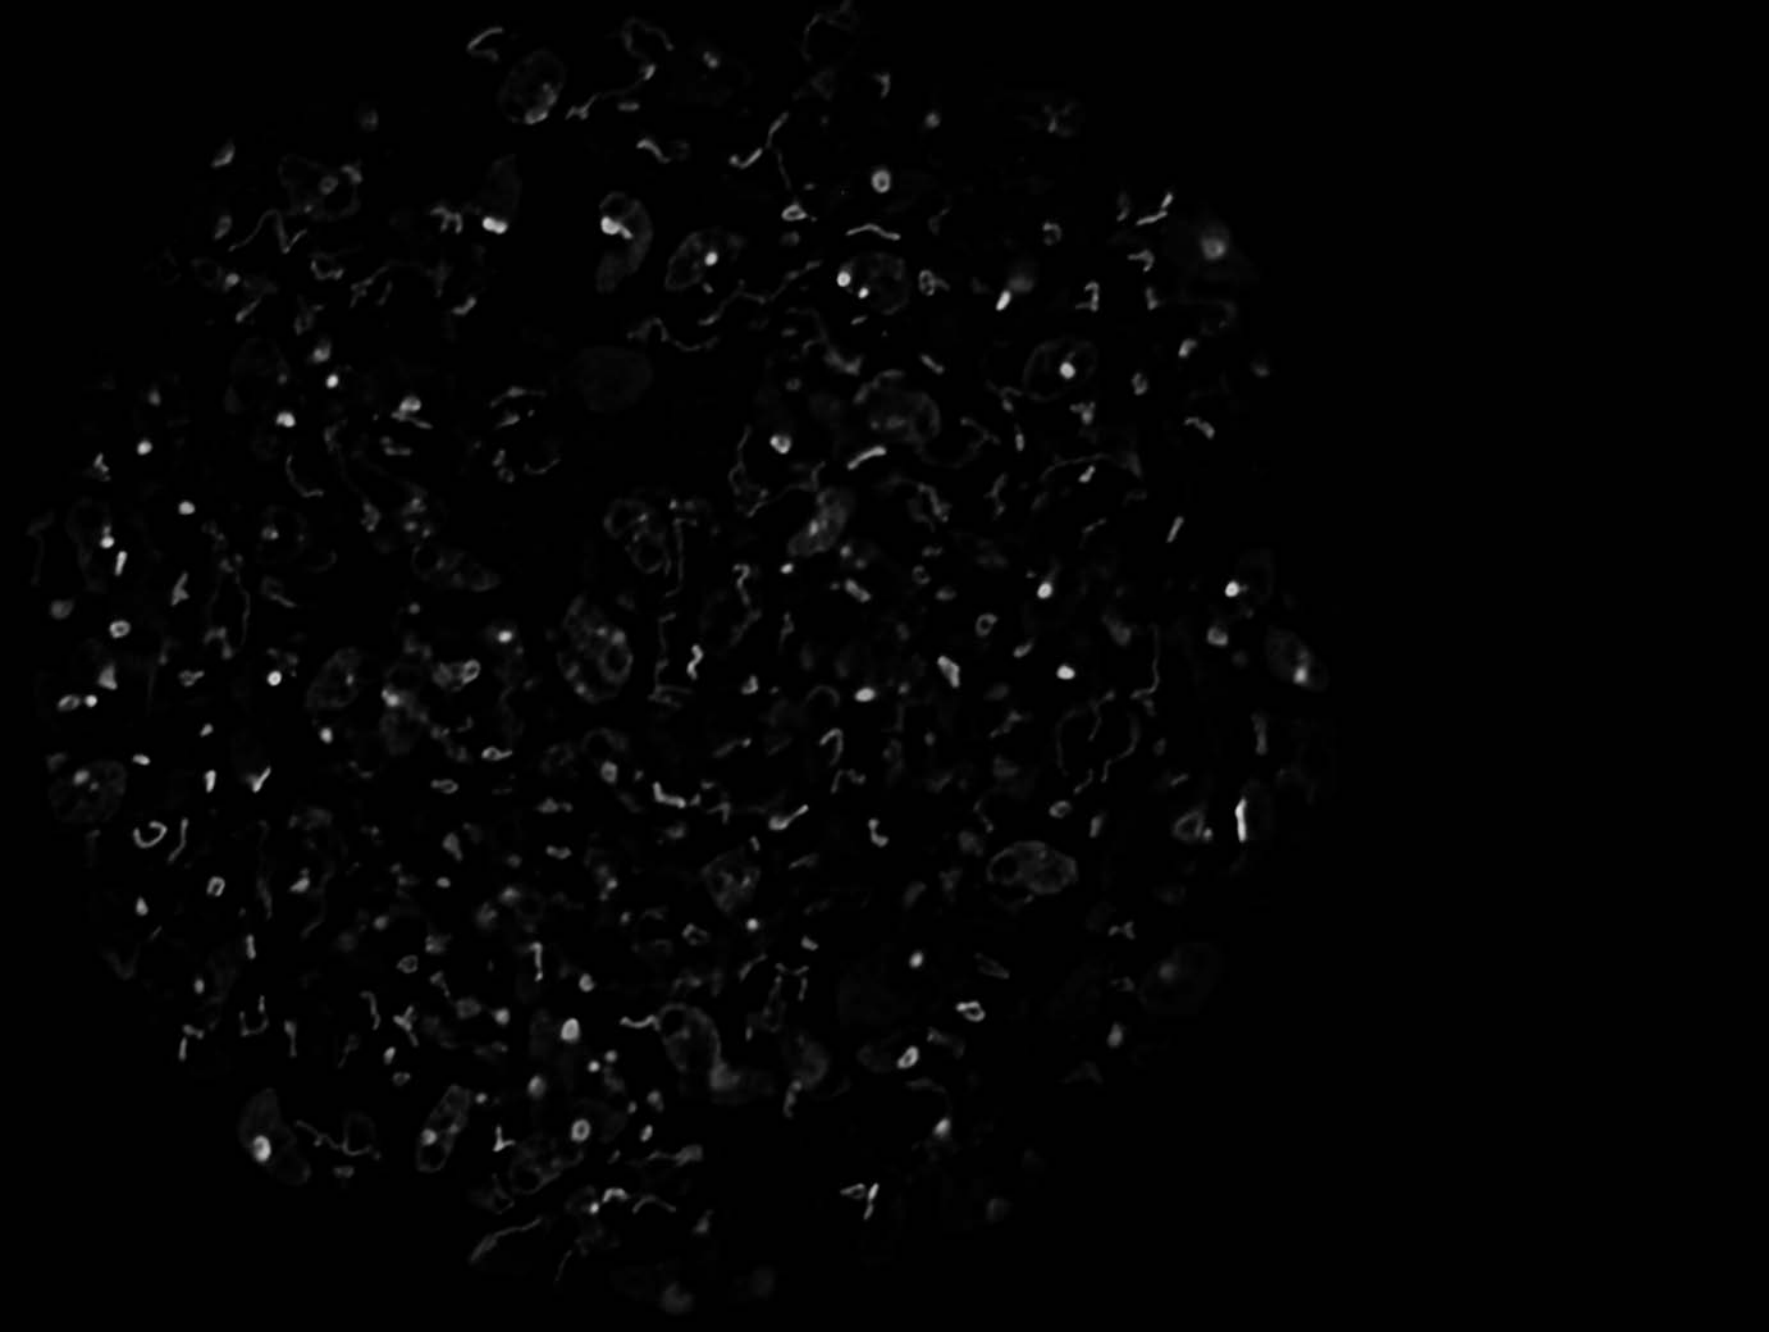

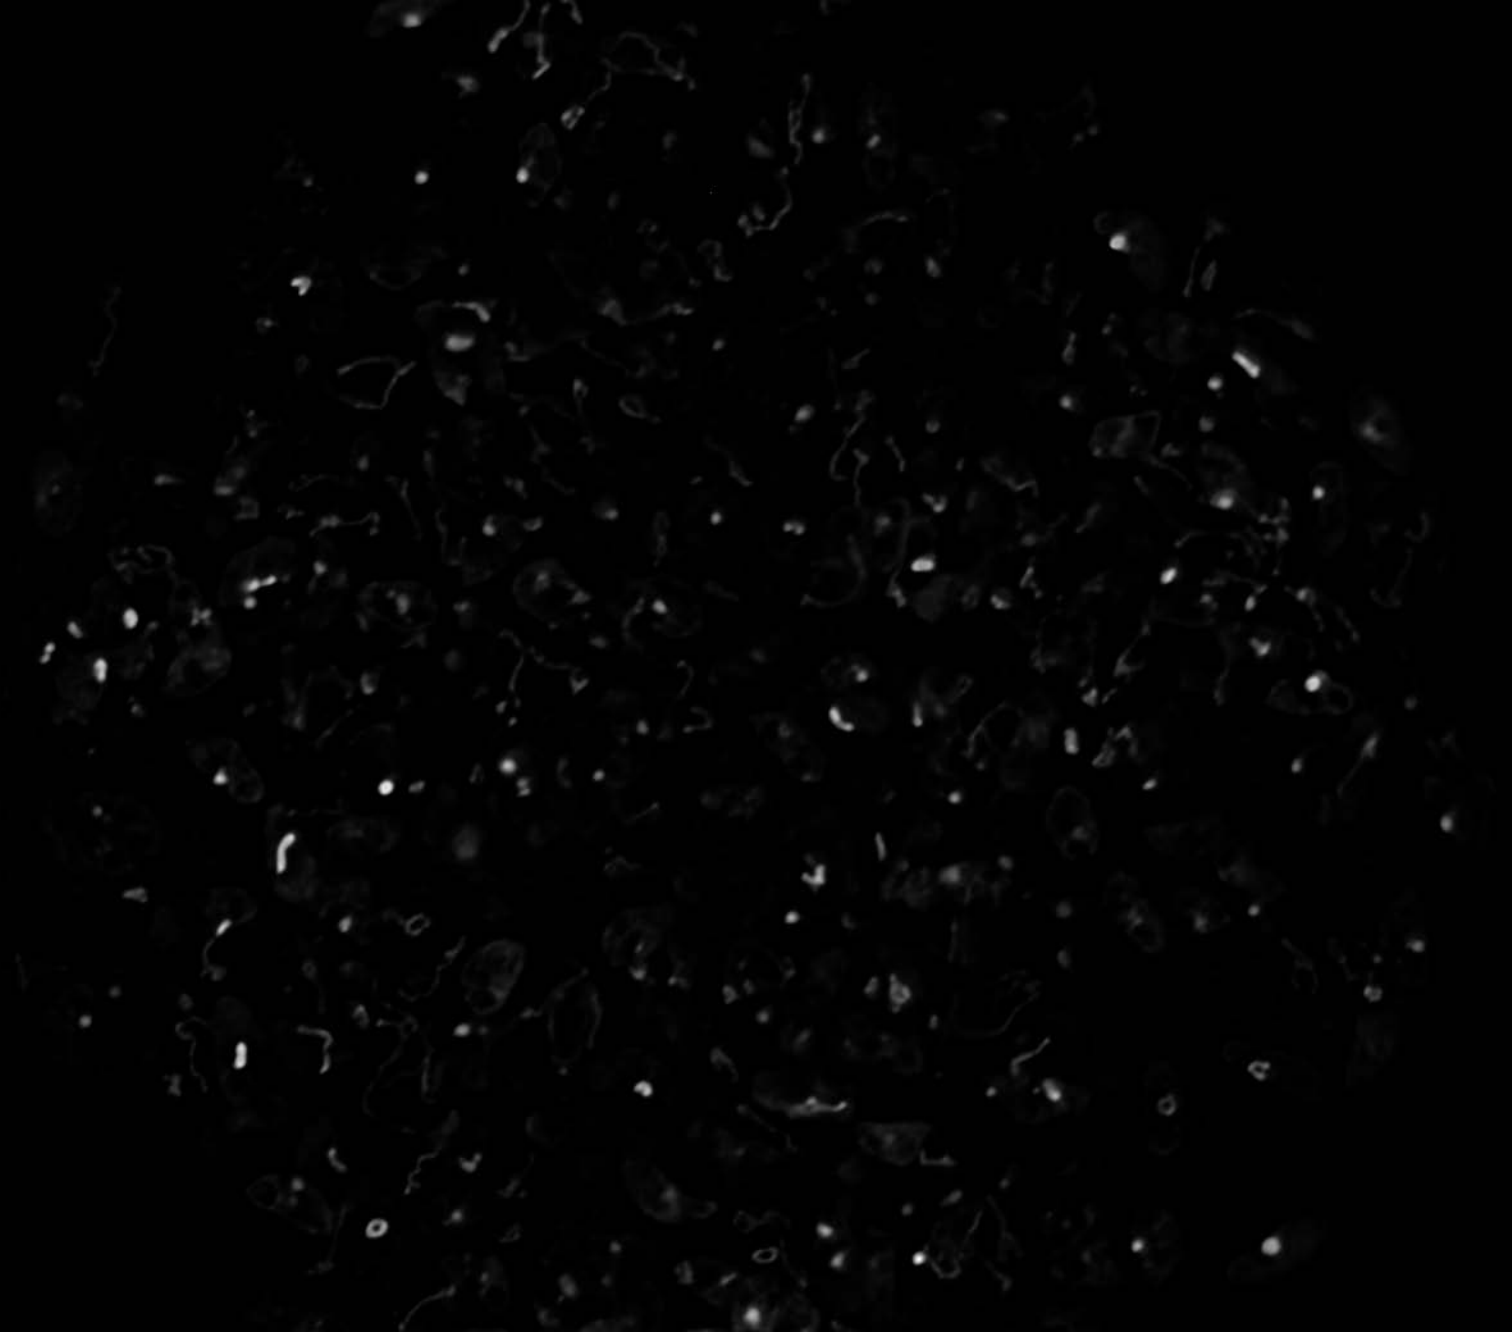



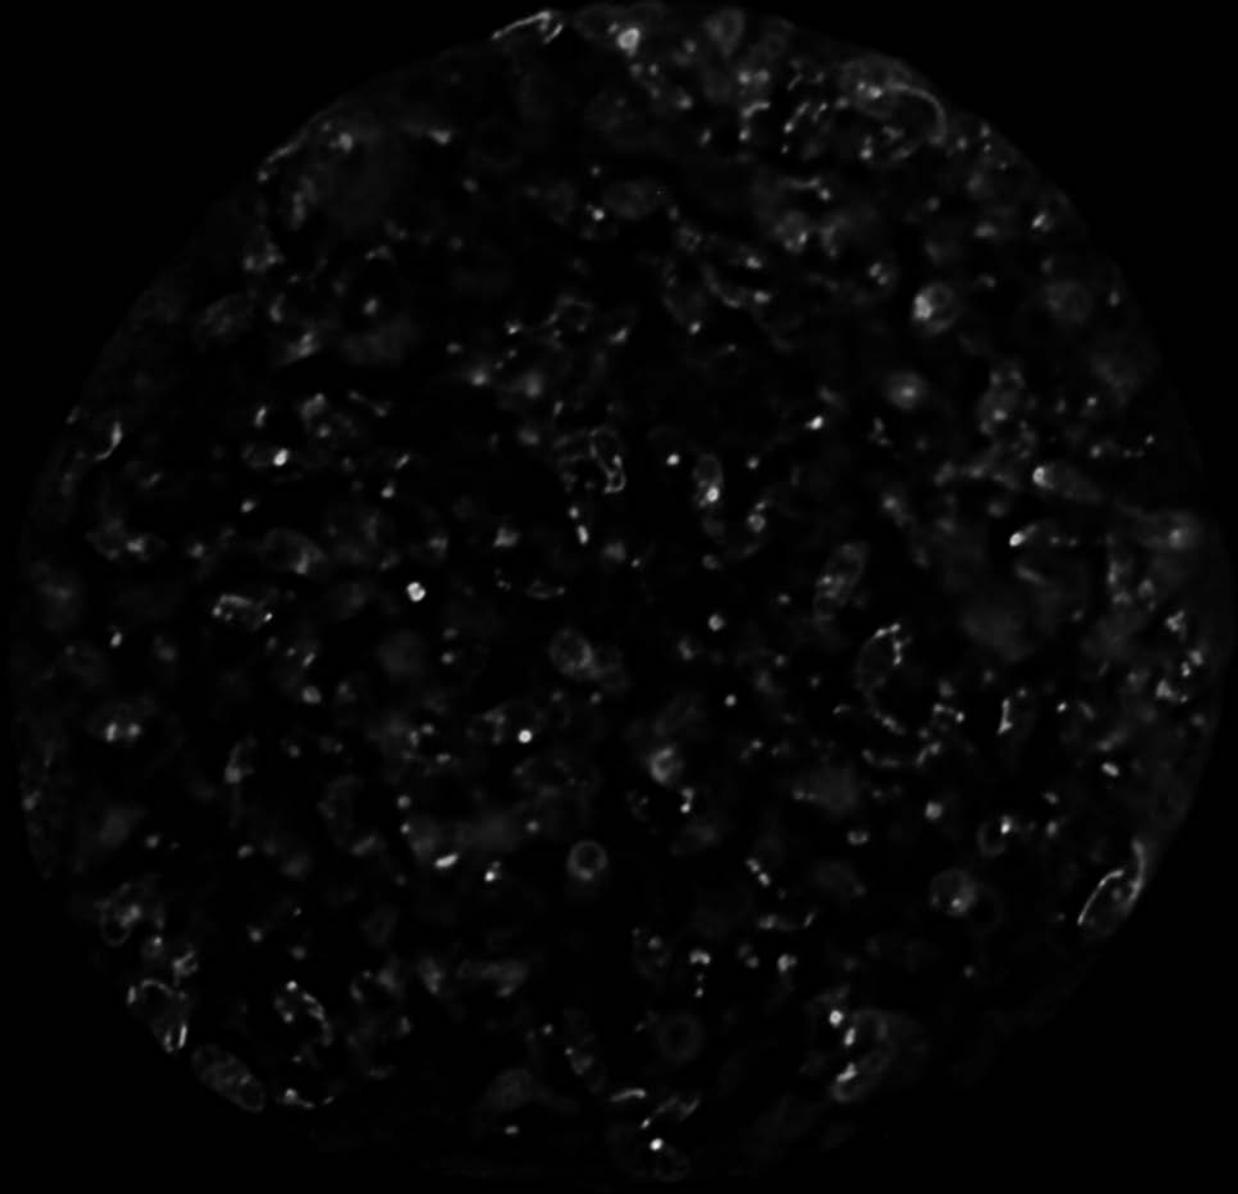



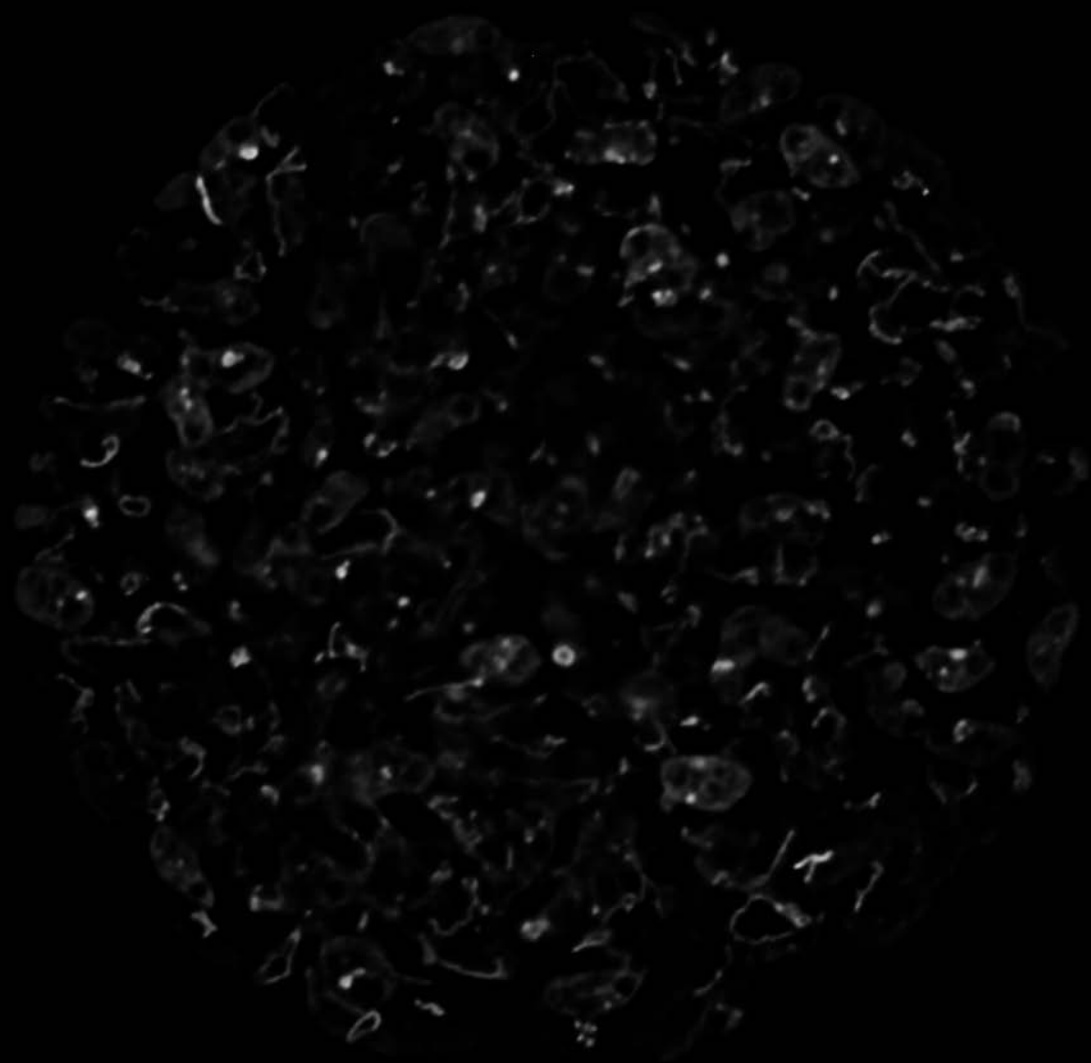





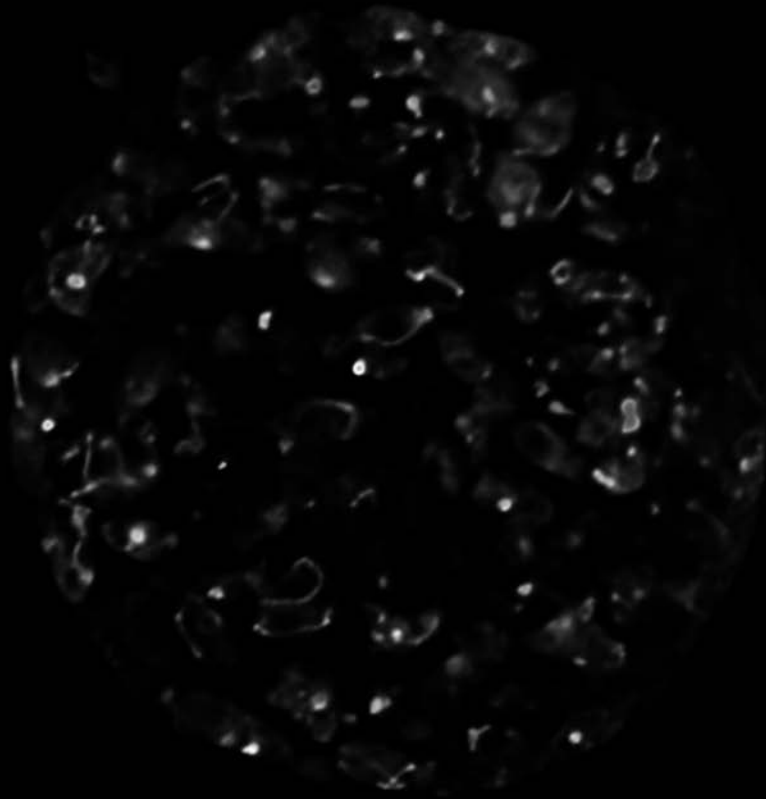

Supplement: pone.0280746.s003.pdf [file pone.0280746.s003.pdf]
